# Supplementary material
Source: PubMed Central journal article supplement (PMC4721106)
Supplement: rspb20152606supp1.pdf [file rspb20152606supp1.pdf]

**Mammalian development does not recapitulate  
suspected key transformations in the evolution of the  
mammalian middle ear**

Héctor E. Ramírez-Chaves, Stephen W. Wroe, Lynne Selwood, Lyn A. Hinds,  
Chris Leigh, Daisuke Koyabu, Nikolay Kardjilov and Vera Weisbecker

**Supplementary information**

## **Supplementary Methods**

### **CT-scans**

Specimens were scanned using micro-computed tomography ( $\mu$ CT) scanners at the Helmholtz-Zentrum in Berlin, the Cambridge University Department of Engineering, University College London, and the Centre for Advanced Imaging at the University of Queensland. Scanning involves the transmission of X-rays through the specimens under different rotation angles; in this way 2D angular projections are collected over 180° or 360°. The set of projections is used for 3D reconstruction of the matrix of absorption coefficients in the sample by a back-projection algorithm. The achieved spatial resolution is in the range of dozens to a few hundred micrometers.

**Supplementary figure 1.** Measurements taken for the analyses. 1, Malleus length; 2, Tympanic annulus diameter; 3, Diameter of bullar part of ectotympanic; 4, Skull length; 5, Dentary length; 6, Inter-malleus length; 7, Intercondylar length; 8, Distance from tip to dentary to anterior rim of ectotympanic; 9, Distance from dentary tip to posterior end of malleus head.

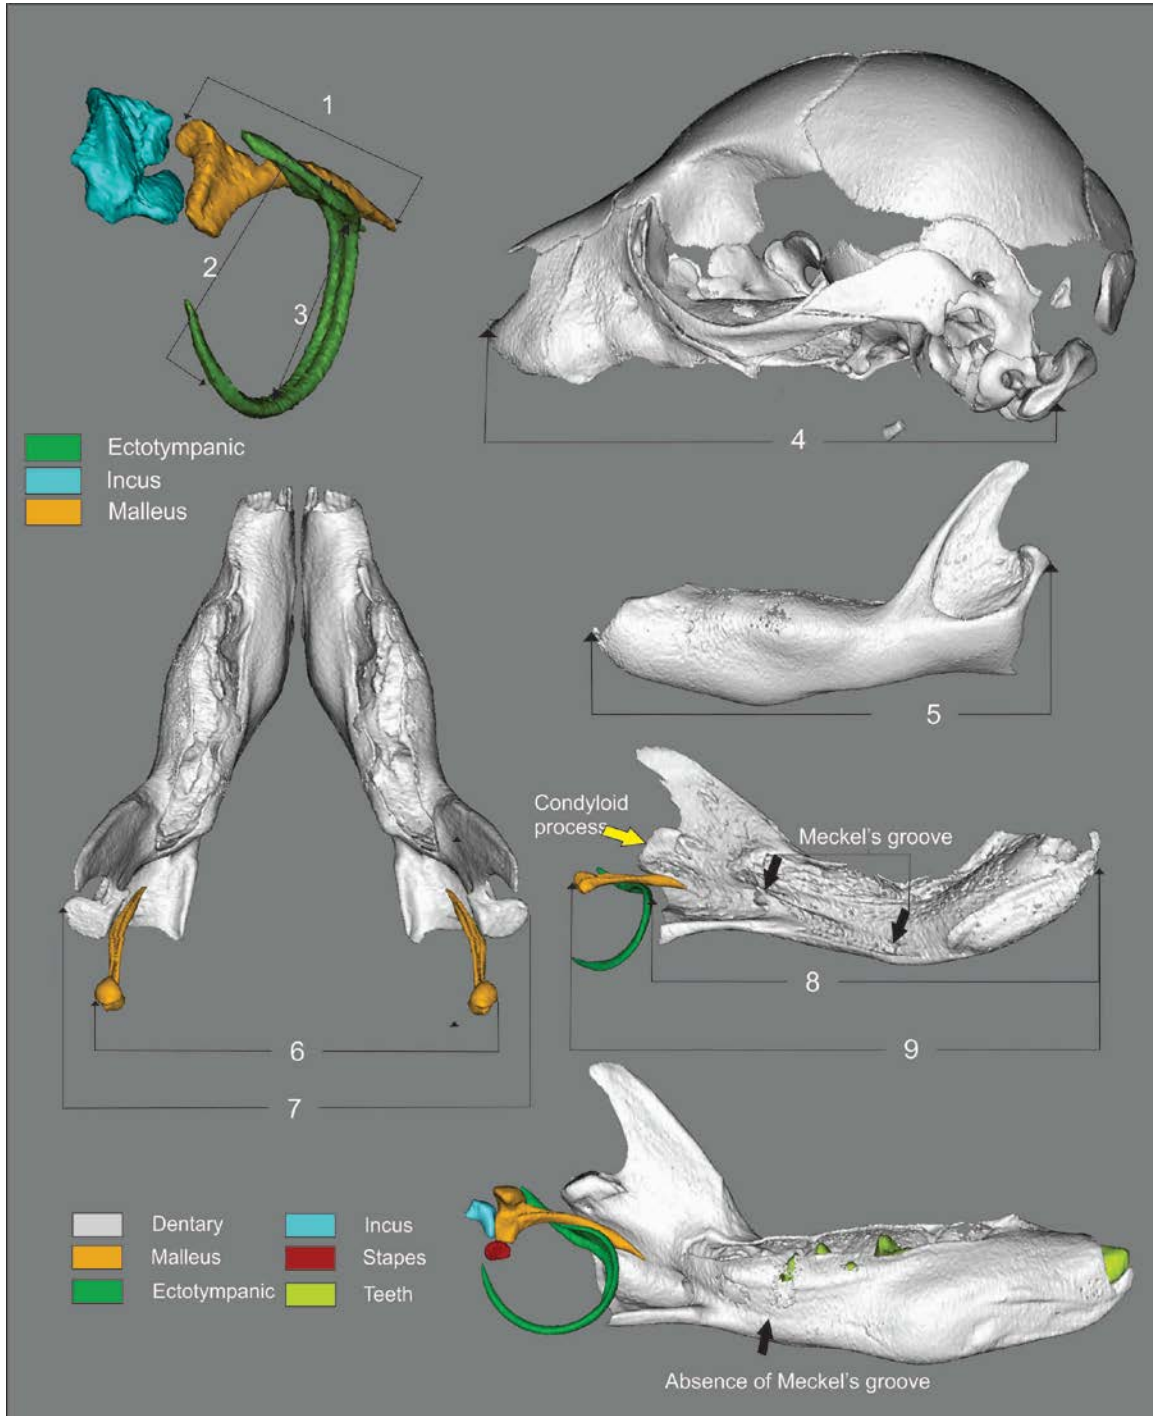

**Supplementary table 1.** Summary of log-log bivariate regressions for four species of marsupials and one monotreme, before and after detachment of middle ear bones, regressing dentary length and condylobasal (CB) lengths against dimensions of the bullar part of the ectotympanic (bullar part), annulus of the ectotympanic (annulus), antero-posterior length of the malleus (malleus a.-p length), and external auditory meatus (EAM). N, Sample size; R<sup>2</sup>, adjusted coefficient of correlation; slope, coefficient of allometry under Standardised Major Axis (SMA); P, P-value for SMA regressions; P1, probability that the slope is equal to 1. Significant allometric slopes are in bold.

| <b>Pre-detachment</b>            |    |                |              |         |                |
|----------------------------------|----|----------------|--------------|---------|----------------|
| <i>Macropus eugenii</i>          |    |                |              |         |                |
| Regression:X-Y                   | n  | R <sup>2</sup> | Slope        | p       | p <sup>1</sup> |
| Dentary – bullar part            | 13 | 0.987          | <b>1.212</b> | 0.000   | 0.000          |
| Dentary – annulus                | 13 | 0.975          | <b>1.325</b> | 0.000   | 0.000          |
| Dentary – malleus a.-p. length   | 13 | 0.915          | <b>1.889</b> | 0.000   | 0.000          |
| CB length – bullar part          | 13 | 0.986          | <b>1.452</b> | 0.000   | 0.000          |
| CB length – annulus              | 13 | 0.979          | <b>1.588</b> | 0.000   | 0.000          |
| CB length – malleus a.-p. length | 13 | 0.929          | <b>2.264</b> | 0.000   | 0.000          |
| <i>Phascolarctos cinereus</i>    |    |                |              |         |                |
| Dentary –bullar part             | 9  | 0.987          | <b>1.754</b> | 0.000   | 0.000          |
| Dentary – annulus                | 9  | 0.974          | <b>1.779</b> | 0.000   | 0.000          |
| Dentary – malleus a.-p. length   | 9  | 0.959          | <b>1.694</b> | 0.000   | 0.000          |
| CB length – bullar part          | 9  | 0.991          | <b>1.935</b> | 0.000   | 0.000          |
| CB length – annulus              | 9  | 0.979          | <b>1.963</b> | 0.000   | 0.000          |
| CB length – malleus a.-p. length | 9  | 0.969          | <b>1.868</b> | 0.000   | 0.000          |
| <i>Sminthopsis macroura</i>      |    |                |              |         |                |
| Dentary –bullar part             | -  | -              | -            | -       | -              |
| Dentary – annulus                | -  | -              | -            | -       | -              |
| Dentary – malleus a.-p. length   | 4  | 0.992          | <b>2.225</b> | 0.0039  | 0.0048         |
| CB length – bullar part          | -  | -              | -            | -       | -              |
| CB length – annulus              | -  | -              | -            | -       | -              |
| CB length – malleus a.-p. length | 3  | 0.990          | <b>3.030</b> | 0.0625  | 0.0462         |
| <i>Trichosurus vulpecula</i>     |    |                |              |         |                |
| Dentary –bullar part             | 9  | 0.987          | <b>1.557</b> | 0.000   | 0.000          |
| Dentary – annulus                | 9  | 0.955          | <b>1.752</b> | 0.000   | 0.000          |
| Dentary – malleus a.-p. length   | 10 | 0.956          | <b>2.350</b> | 0.000   | 0.000          |
| CB length – bullar part          | 9  | 0.978          | <b>1.470</b> | 0.000   | 0.00019        |
| CB length – annulus              | 9  | 0.944          | <b>1.655</b> | 0.000   | 0.00061        |
| CB length – malleus a.-p. length | 9  | 0.871          | <b>2.084</b> | 0.00023 | 0.00059        |
| <i>Tachyglossus aculeatus</i>    |    |                |              |         |                |
| Dentary – annulus                | 7  | 0.974          | <b>1.388</b> | 0.000   | 0.0057         |

|                                  |    |       |              |       |         |
|----------------------------------|----|-------|--------------|-------|---------|
| Dentary – malleus a.-p. length   | 7  | 0.988 | <b>1.939</b> | 0.000 | 0.000   |
| CB length – annulus              | 5  | 0.940 | 1.298        | 0.006 | 0.15886 |
| CB length – malleus a.-p. length | 5  | 0.976 | <b>1.873</b> | 0.002 | 0.005   |
| <b>Post-detachment</b>           |    |       |              |       |         |
| <i>Bettongia penicillata</i>     |    |       |              |       |         |
| Dentary –bullar part             | 14 | 0.789 | <b>0.486</b> | 0.000 | 0.000   |
| Dentary – annulus                | 14 | 0.762 | <b>0.540</b> | 0.000 | 0.000   |
| Dentary – malleus a.-p. length   | 14 | 0.920 | <b>0.549</b> | 0.000 | 0.000   |
| CB length – bullar part          | 14 | 0.807 | <b>0.469</b> | 0.000 | 0.000   |
| CB length – annulus              | 14 | 0.783 | <b>0.522</b> | 0.000 | 0.000   |
| CB length – malleus a.-p. length | 14 | 0.929 | <b>0.530</b> | 0.000 | 0.000   |
| CB length – EAM                  | 9  | 0.254 | <b>0.317</b> | 0.167 | 0.0034  |
| Dentary – EAM                    | 9  | 0.293 | <b>0.314</b> | 0.132 | 0.0027  |
| <i>Tachyglossus aculeatus</i>    |    |       |              |       |         |
| Dentary – annulus                | 6  | 0.772 | <b>0.390</b> | 0.009 | 0.0038  |
| Dentary – malleus a.-p. length   | 5  | 0.915 | 0.794        | 0.003 | 0.186   |
| CB length – annulus              | 6  | 0.723 | <b>0.606</b> | 0.004 | 0.034   |
| CB length – malleus a.-p. length | 7  | 0.925 | 1.007        | 0.000 | 0.954   |

**Supplementary table 2.** Tests for posterior and medial replacement of the post-dentary bones during development. Antero-posterior positioning defines the dentary length (distance between dentary tip and dentary condyle) as one and determining the distances between dentary tip and ectotympanic/malleus as a percentage of dentary length. Light grey fields identify overall posterior movement of ossicles relative to dentary condyle, dark grey fields identify overall anterior movement; white fields suggest no change.

| Species                         | n before(b)<br>and after<br>(a)<br>detachment |    | Antero-posterior position<br>relative to dentary<br>condyle |                                        | Spearman<br>rank<br>correlation:<br>Inter-malleus<br>vs. inter-<br>condylar<br>width | p     |
|---------------------------------|-----------------------------------------------|----|-------------------------------------------------------------|----------------------------------------|--------------------------------------------------------------------------------------|-------|
|                                 |                                               |    | Anterior rim<br>of<br>ectotympanic                          | Posterior<br>end of<br>malleus<br>head |                                                                                      |       |
| <i>Macropus eugenii</i>         | <b>b</b>                                      | 13 | 1.01-0.88                                                   | 1.10-1.13                              | 1                                                                                    | 0.000 |
|                                 | <b>a</b>                                      | 2  | <b>1.09-1.15</b>                                            | <b>1.12-1.14</b>                       |                                                                                      |       |
| <i>Phascolarctos cinereus</i>   | <b>b</b>                                      | 9  | 0.92-1.00                                                   | 1.12-1.17                              | 0.99                                                                                 | 0.000 |
|                                 | <b>a</b>                                      | 2  | <b>0.92-0.94</b>                                            | <b>1.07-1.11</b>                       |                                                                                      |       |
| <i>Trichosurus vulpecula</i>    | <b>b</b>                                      | 10 | 0.89-0.98                                                   | 1.06-1.14                              | 1                                                                                    | 0.000 |
|                                 | <b>a</b>                                      | 5  | <b>0.85-0.87</b>                                            | <b>1.02-1.09</b>                       |                                                                                      |       |
| <i>Sminthopsis macroura</i>     | <b>b</b>                                      | 2  | 0.96-0.93                                                   | 1.02-1.08                              | 0.95                                                                                 | 0.003 |
|                                 | <b>a</b>                                      | 6  | <b>0.85-0.93</b>                                            | <b>1.09-1.16</b>                       |                                                                                      |       |
| <i>Bettongia penicillata</i>    | <b>b</b>                                      | 3  | 0.91-0.94                                                   | 1.11-1.12                              | 0.99                                                                                 | 0.000 |
|                                 | <b>a</b>                                      | 14 | <b>0.84-0.95</b>                                            | <b>1.06-1.14</b>                       |                                                                                      |       |
| <i>Monodelphis domestica</i>    | <b>b</b>                                      | 9  | 0.86-0.97                                                   | 1.10-1.17                              | 0.96                                                                                 | 0.000 |
|                                 | <b>a</b>                                      | 11 | <b>0.88-1.00</b>                                            | <b>1.10-1.18</b>                       |                                                                                      |       |
| <i>Ornithorhynchus anatinus</i> | <b>b</b>                                      | 3  | 0.77-0.81                                                   | 0.86-0.91                              | 1                                                                                    | 0.017 |
|                                 | <b>a</b>                                      | 2  | <b>0.84-0.88</b>                                            | <b>0.94-0.94</b>                       |                                                                                      |       |
| <i>Tachyglossus aculeatus</i>   | <b>b</b>                                      | 8  | 0.94-1.06                                                   | 1.05-1.13                              | 0.96                                                                                 | 0.000 |
|                                 | <b>a</b>                                      | 2  | <b>0.97-1.00</b>                                            | <b>1.08-1.12</b>                       |                                                                                      |       |

**Supplementary table 3.** Accession number, age, references for aging of the specimens used in this study. *Bettongia penicillata*; South Australian Museum (SAM). *Macropus eugenii*; CSIRO Sustainable Ecosystems Canberra, colony collected (ACT permit K1606); CSIRO Sustainable Ecosystems Animal Ethics Approval 06-36. *Phascolarctos cinereus*; Adelaide University, field collected (DENWR (SA) License Nos. K23749 /1 to 25). *Sminthopsis macroura*, collected from a colony (MAEC (Vic) License No. 06117). *Trichosurus vulpecula*, collected from a colony (MAEC (Vic) License No. 06118). *Monodelphis domestica*, collected from preserved specimens University Museum of University of Tokyo (UMUT), and scans courtesy of by T. Rowe and T. Macrini. *Ornithorhynchus anatinus*, collected from preserved specimens at Queensland Museum (J and JM), Australian Museum (AusMusM). *Tachyglossus aculeatus*, collected from preserved specimens at Queensland Museum (J and JM), Australian Museum (AusMusM), and South Australian Museum (SAM).

| Accession Number                       | Estimated age | References |
|----------------------------------------|---------------|------------|
| <b><i>Tachyglossus aculeatus</i></b>   |               |            |
| SAM2788                                |               |            |
| AusMusM5014                            | ~35           | 1          |
| JM14948                                | <34           | 2          |
| SAM9592                                | ~45           | 1          |
| SAM9591                                | ~45           | 1          |
| JM9741                                 | ~50           | 2,3        |
| J8664                                  | ~70           | 2,3        |
| JM11130                                | ~70           | 2,3        |
| JM4994                                 | ~70           | 2,3        |
| JM8684                                 | ~80           | 1          |
| JM7688                                 | >100          | 2,3        |
| <b><i>Ornithorhynchus anatinus</i></b> |               |            |
| M646                                   | ~16           |            |
| AusMus5017                             | ~35           | 1          |
| JM11450                                | ~45           | 1          |
| QM 348                                 | ~60           | 1          |
| JM no number                           | >100          |            |
| <b><i>Sminthopsis macroura</i></b>     |               |            |
| Scrassd4                               | 4             | Actual age |
| Scrassd5                               | 5             | Actual age |
| Scrassd6                               | 6             | Actual age |
| Scrassd7                               | 7             | Actual age |
| Scrassd19                              | 19            | Actual age |
| Scrassd21                              | 21            | Actual age |
| Scrassd22                              | 22            | Actual age |
| Scrassd31                              | 31            | Actual age |

|                                      |       |            |
|--------------------------------------|-------|------------|
| Smac54dPYA_No44_08                   | 54    | Actual age |
| Smacd64d_9_09                        | 64    | Actual age |
| SmacPYE74d_No14_08                   | 74    | Actual age |
| SmacAdult33_08                       | Adult | Actual age |
| <hr/>                                |       |            |
| <b><i>Trichosurus vulpecula</i></b>  |       |            |
| TVAB                                 | 0-7   | 4          |
| SmTV                                 | ~11   | 4          |
| TVAC                                 | ~14   | 4          |
| TVAB-08                              | 10    | 4          |
| TVAD                                 | 9-14  | 4          |
| TVPYE                                | ~15   | 4          |
| TVPYF_08_NoName                      | ~14   | 4          |
| TVPYK                                | ~21   | 4          |
| TVPYF_08                             | ~21   | 4          |
| TV7                                  | ~35   | 4          |
| TV6                                  | 35-42 | 4          |
| TV8                                  | ~68   | 4          |
| TV3                                  | ~85   | 4          |
| TV2                                  | >100  | 4          |
| TV1                                  | Adult | 5          |
| <hr/>                                |       |            |
| <b><i>Bettongia penicillata</i></b>  |       |            |
| SAM24233                             | 13-15 | 6          |
| SAM24239                             | ~20   | 6          |
| SAM24235                             | ~28   | 6          |
| SAM24229                             | ~28   | 6          |
| SAM24244                             | ~28   | 6          |
| SAM24238                             | ~35   | 6          |
| SAM24230                             | ~46   | 6          |
| SAM24232                             | ~49   | 6          |
| SAM24240                             | ~56   | 6          |
| SAM24246                             | 60-69 | 6          |
| SAM24228                             | ~80   | 6          |
| SAM24241                             | >85   | 6          |
| SAM24243                             | >85   | 6          |
| SAM24242                             | >85   | 6          |
| SAM24248                             | >85   | 6          |
| SAM24252                             | >85   | 6          |
| SAM24247                             | Adult | 6          |
| <hr/>                                |       |            |
| <b><i>Phascolarctos cinereus</i></b> |       |            |
| Pcin3_14                             | ~10   |            |
| Pcin3_9                              | ~15   |            |
| Pcin3_7                              | ~21   |            |
| Pcin3_6                              | ~25   |            |



|                                     |        |            |
|-------------------------------------|--------|------------|
| Pcin3_10                            | ~28    |            |
| Pcin3_8                             | ~30    |            |
| Pcin3_5                             | ~46    | 7          |
| Pcin3_13                            | ~51    | 7          |
| Pcin3_11                            | ~52    |            |
| Pcin3_1                             | ~57    | 7          |
| PcinLge01                           | >100   | 7          |
| PcinLge03                           | >101   | 7          |
| PcinLge02                           | >102   | 7          |
| <hr/>                               |        |            |
| <b><i>Macropus eugenii</i></b>      |        |            |
| Meug1621                            | 3-5    | 8          |
| Meug8647                            | ~10    | 8          |
| Meug1694                            | ~17    | 8          |
| Meug8931                            | 17-26  | 8,9        |
| Meug1658                            | ~26-28 | 8          |
| Meug8770                            | ~26    | 8          |
| Meug2957                            | ~27    | 8          |
| Meug2965                            | ~27    | 8          |
| Meug1682                            | ~28    | 8          |
| Meug8858                            | ~42    | 8          |
| Meug2912                            | ~49    | 8          |
| Meug17162                           | 42-59  | 9          |
| Meug1723                            | ~58    |            |
| Meug1720                            | >58    |            |
| Meug8737                            | >90    |            |
| <hr/>                               |        |            |
| <b><i>Monodelphis domestica</i></b> |        |            |
| UMUT-DK150001                       | 10     | Actual age |
| UMUT-DK150002                       | 12     | Actual age |
| UMUT-DK150003                       | 12     | Actual age |
| UMUT-DK150004                       | 13     | Actual age |
| UMUT-DK150005                       | 14     | Actual age |
| UMUT-DK150006                       | ~14    | Actual age |
| UMUT-DK150007                       | 15     | Actual age |
| UMUT-DK150008                       | 16     | Actual age |
| UMUT-DK150009                       | 17     | Actual age |
| Day 27 TMM M 7595                   | 27     | Actual age |
| Day 27 TMM M 8261                   | 27     | Actual age |
| Day 27 TMM M 8265                   | 27     | Actual age |
| Day 48 TMM M 7536                   | 48     | Actual age |
| Day 48 TMM M 8269                   | 48     | Actual age |
| Day 56 TMM M 8266                   | 56     | Actual age |
| Day 57 TMM M 7539                   | 57     | Actual age |

|                   |    |            |
|-------------------|----|------------|
| Day 75 TMM M 7542 | 75 | Actual age |
| Day 76 TMM M 8267 | 76 | Actual age |
| Day 90 TMM M 7545 | 90 | Actual age |
| Day 90 TMM M 8268 | 90 | Actual age |

---

### References for Table S3.

1. Ashwell K ed 2013 *Neurobiology of Monotremes. Brain evolution in our distant mammalian cousins*. CSIRO, The University of New South Wales.
2. Rissmiller P. 1999 *The echidna Australia's enigma*. Hugh Lauter Levin Associate.
3. Griffiths M. 1965 Rate of growth and intake of milk in a suckling echidna. *Comp Biochem Physiol* **16**, 383–392.
4. Lyne AG, Verhagen AMW. 1957 Growth of the marsupial *Trichosurus vulpecula* and a comparison with some higher mammals. *Growth* **21**, 167–195.
5. Kingsmill E. 1962 An investigation of criteria for estimating age in the marsupials *Trichosurus vulpecula* Kerr and *Perameles nasuta* Geoffroy. *Aus. J. Zool.* **10**, 597–616.
6. Johnson PM, Delean S. 2001 Reproduction in the northern bettong, *Bettongia tropica* Wakefield (Marsupialia: Potoroidae), in captivity, with age estimation and development of pouch young. *Wildlife Res.* **28**, 79–85.
7. Krockenberger AK. 1996 Composition of the milk of the koala, *Phascolarctos cinereus*, an arboreal folivore. *Physiol. Zool.* **69**, 701–718.
8. Clark CT, Smith KK. 1993 Cranial osteogenesis in *Monodelphis domestica* (Didelphidae) and *Macropus eugenii* (Macropodidae). *J. Morphol.* **215**, 119–149.
9. Inns RW. 1982 Age Determination in the Kangaroo Island wallaby, *Macropus eugenii* (Desmarest). *Aust. Wildl. Res.* **9**, 213–220

**Supplementary table 4.** Measurements used for the analyses. Maximum distance between the posterior part of the malleus (PPM). Maximum distance of the condyloid process (CDP). Anterior-most part of the dentary until the anterior part of the ectotympanic (ECT). Anterior-most part of the dentary and the posterior part of the malleus (MAL). Anteroposterior length of the dentary at the level of the condyloid process (CON). Dentary length (DL). Condylobasal length (CBL). Malleus antero-posterior length (MP). Bullar part of ectotympanic (BPE). Annulus of ectotympanic (ANE). Auditory meatus (AM).

| Accession Number                | PPM   | CDP       | ECT       | MAL        | CON   | DL    | CBL    | MP        | BPE  | ANE  | AM       |
|---------------------------------|-------|-----------|-----------|------------|-------|-------|--------|-----------|------|------|----------|
| <i>Tachyglossus aculeatus</i>   |       |           |           |            |       |       |        |           |      |      |          |
| SAM2788                         | -     | -         | -         | -          | 1.9   | 1.9   | -      | -         | -    | -    | -        |
| AusMusM5014                     | 3.62  | 4.26      | 6.12      | 6.5        | 5.89  | 5.78  | -      | 0.19      | -    | 0.32 | -        |
| JM14948                         | 8.6   | 9.18      | 14.8<br>8 | 15.91      | 15.17 | 15    | 24.05  | 1.24      | -    | 1.34 | -        |
| SAM9592                         | 11.27 | 11.7<br>1 | 19.1<br>8 | 19.73      | 18.07 | 18.07 | -      | 1.4       | -    | 1.5  | -        |
| SAM9591                         | 12.03 | 12.2<br>7 | 18.8<br>4 | 19.96      | 18.11 | 18.07 | 29.19  | 1.71      | -    | 1.52 | -        |
| JM9741                          | 19.07 | 18.7<br>6 | 24.3<br>7 | 27.69      | 25.55 | 25.55 | 43.71  | 4         | -    | 3.13 | -        |
| J8664                           | 19.35 | 18.7<br>2 | 19.4<br>2 | 23.32      | 20.65 | 28.09 | 41.55  | 3.73      | -    | 2.4  | -        |
| JM11130                         | 18.67 | 17.5<br>9 | 27.0<br>9 | 30.39      | 28.45 | 28.23 | 47.28  | 3.83      | -    | 2.83 | -        |
| JM4994                          | 19.23 | 19.3<br>3 | 27.5<br>4 | 30.91      | 28.43 | -     | -      | 4.22      | -    | 2.93 | -        |
| JM8684                          | 22.84 | 21.4<br>2 | 33.5<br>7 | 38.59      | 34.46 | 34.55 | 51.67  | 6.06      | -    | 3.64 | -        |
| JM7688                          | 40.96 | 42.0<br>3 | 93.6<br>8 | 100.5<br>9 | 93.48 | 93.48 | 112.98 | 13.1<br>9 | -    | 5.48 | -        |
| <i>Ornithorhynchus anatinus</i> |       |           |           |            |       |       |        |           |      |      |          |
| M646                            | 2.4   | 4         | 3.6       | 4.01       | 4.65  | -     | -      | -         | -    | -    | -        |
| AusMus5017                      | 3.33  | 5.98      | 4.62      | 5.08       | 5.93  | -     | -      | -         | -    | -    | -        |
| JM11450                         | 14.3  | 24.2<br>6 | 26.0<br>4 | 29.39      | 32.26 | -     | -      | -         | -    | -    | -        |
| QM 348                          | 17.19 | 32.6<br>6 | 48.6<br>1 | 53.99      | 57.66 | -     | -      | -         | -    | -    | -        |
| JM no number                    | 20.67 | 39.4<br>4 | 69.6<br>6 | 74.55      | 79.12 | -     | -      | -         | -    | -    | -        |
| <i>Sminthopsis macroura</i>     |       |           |           |            |       |       |        |           |      |      |          |
| Scrassd4                        |       |           | -         | -          | 1.63  | 1.63  | -      | -         | -    | -    | -        |
| Scrassd5                        | 1.96  | 1.82      | -         | 1.7        | 1.66  | 1.66  | 2.77   | 0.13      | -    | -    | -        |
| Scrassd6                        |       |           | -         | -          | 1.83  | 1.83  | -      | -         | -    | -    | -        |
| Scrassd7                        | 2.17  | 2.24      | 2.02      | 2.24       | 2.1   | 2.1   | 3.15   | 0.24      | -    | -    | -        |
| Scrassd19                       |       |           | 3.31      | 3.87       | 3.57  | 3.57  |        | 0.65      | 0.61 | 0.51 | -        |
| Scrassd21                       | 2.01  | 2.27      |           |            |       |       |        |           |      |      |          |
| Scrassd22                       | 4.35  | 4.5       | 3.87      | 4.77       | 4.39  | 4.39  | 5.7    | 1.24      | 0.97 | 0.86 | -        |
| Scrassd31                       | 6.15  | 6.3       | 5.37      | 7.31       | 6.3   | 6.3   | 8.82   | 2.36      | 1.73 | 1.54 | 1.3<br>9 |
| Smac54dPYA_No44_08              | 7.71  | 11.2<br>9 | 11.8<br>7 | 14.96      | 13.43 | 13.43 | 18.78  | 2.92      | 2.99 | 2.38 | 1.8<br>6 |
| Smacd64d_9_09                   | 7.26  | 11.4<br>3 | 13.8<br>2 | 16.54      | 14.96 | 14.96 | 20.19  | 2.64      | 2.76 | 2.4  | 1.7<br>5 |
| SmacPYE74d_No14_08              |       |           | 13.9<br>6 | 16.95      | 15.78 | 15.78 | 21.45  | 2.65      | 2.55 | 2.33 | 1.6<br>7 |

|                                      |       |       |       |       |       |       |        |       |       |       |      |
|--------------------------------------|-------|-------|-------|-------|-------|-------|--------|-------|-------|-------|------|
| SmacAdult33_08                       | 8.29  | 14.05 | 17.81 | 20.6  | 19.06 | 19.06 | 25.23  | 3.07  | 2.66  | 2.17  | 1.7  |
| <b><i>Trichosurus vulpecula</i></b>  |       |       |       |       |       |       |        |       |       |       |      |
| TVAB                                 |       |       | -     | -     | 3.22  | 3.22  | -      | -     | -     | -     | -    |
| SmTV                                 | 4.14  | 4.33  | 4.2   | 4.79  | 4.28  | 4.28  | -      | 0.35  | -     | -     | -    |
| TVAC                                 | 5.5   | 5.91  | 5.75  | 6.31  | 5.93  | 5.93  | 8.19   | 0.67  | 1.08  | 0.94  | -    |
| TVAB-08                              | 5.85  | 6.14  | 6.14  | 7.29  | 6.55  | 6.55  | 8.95   | 1.24  | 1.22  | 0.9   | -    |
| TVAD                                 | 6.45  | 6.98  | 6.37  | 7.63  | 6.97  | 6.97  | 9.17   | 1.37  | 1.27  | 1.01  | -    |
| TVPYE                                | 7.5   | 8.18  | 7.05  | 8.7   | 7.81  | 7.81  | 10.95  | 1.83  | 1.7   | 1.49  | -    |
| TVPYF_08_No Name                     | 7.4   | 8.36  | 7.36  | 8.91  | 8.1   | 8.1   | 11.15  | 1.76  | 1.77  | 1.46  | -    |
| TVPYK                                | 8.52  | 8.91  | 8.3   | 10.39 | 9.14  | 9.14  | 12.06  | 2.32  | 2.11  | 1.88  | -    |
| TVPYF_08                             | 8.19  | 8.73  | 8.06  | 9.94  | 9.08  | 9.08  | 12.23  | 2.06  | 1.98  | 1.75  | -    |
| TV7                                  | 9.58  | 10.65 | 9.03  | 11.3  | 10.18 | 10.18 | 13.92  | 2.93  | 2.51  | 2.26  | -    |
| TV6                                  | 11.14 | 12.34 | 9.9   | 12.94 | 11.6  | 11.6  | 16.91  | 3.15  | 2.91  | 2.52  | -    |
| TV8                                  | 15.95 | 19.08 | 17.52 | 23.01 | 20.26 | 20.26 | 27.67  | 6.08  | 5.39  | 4.86  | 4.34 |
| TV3                                  | 17.56 | 21.48 | 20.71 | 27.52 | 23.87 | 23.87 | 33.89  | 7.13  | 6.7   | 6.35  | 4.26 |
| TV2                                  | 46.11 | 63.51 | 67.81 | 84    | 76.85 | 76.85 | 105.35 | 18.81 | 18.23 | 13.8  | 7.86 |
| TV1                                  | 51.17 | 67.24 | 68.54 | 87.4  | 79.63 | 79.63 | 106.59 | 19.88 | 18.96 | 15.83 | 5.67 |
| <b><i>Bettongia penicillata</i></b>  |       |       |       |       |       |       |        |       |       |       |      |
| SAM24233                             | 6.4   | 7.07  | 6.92  | 8.14  | 7.36  | 7.36  | 10.85  | 1.78  | 1.6   | 1.29  | -    |
| SAM24239                             | 8.87  | 9.72  | 9.06  | 10.79 | 9.71  | 9.71  | 13.96  | 2.6   | 2.17  | 1.87  | -    |
| SAM24235                             | 10.71 | 11.46 | 10.72 | 13.14 | 11.75 | 11.75 | 16.23  | 3.83  | 2.45  | 2.18  | -    |
| SAM24229                             | 12.14 | 14.07 | 11.57 | 15.19 | 13.6  | 13.6  | 19     | 4.65  | 3.23  | 2.79  | -    |
| SAM24244                             | 11.87 | 13.18 | 11.81 | 15.37 | 13.93 | 13.93 | 18.99  | 4.81  | 3.37  | 3.08  | -    |
| SAM24238                             | 13.05 | 14.31 | 12.35 | 16.5  | 14.45 | 14.45 | 20.62  | 4.81  | 3.62  | 3.3   | -    |
| SAM24230                             | 14.39 | 16.77 | 14.68 | 19.59 | 17.45 | 17.45 | 25.24  | 6.3   | 4.59  | 4.07  | -    |
| SAM24232                             | 14.8  | 17.49 | 15.52 | 20.69 | 18.1  | 18.1  | 26.02  | 5.95  | 4.6   | 4.3   | -    |
| SAM24240                             | 16.72 | 20.31 | 17.41 | 23.07 | 20.55 | 20.55 | 29.3   | 6.94  | 5.46  | 5.04  | 4.03 |
| SAM24246                             | 16.65 | 21.54 | 19.62 | 25.8  | 23.15 | 23.15 | 33.78  | 6.97  | 6.31  | 5.02  | 3.74 |
| SAM24228                             | 19.42 | 27.08 | 24.34 | 30.42 | 27.12 | 27.12 | 40.36  | 7.2   | 6.12  | 5.11  | 3.28 |
| SAM24241                             | 20.31 | 27.65 | 24.82 | 30.82 | 29.01 | 29.01 | 44.59  | 7.32  | 7.01  | 5.25  | 3.54 |
| SAM24243                             | 19.73 | 28.89 | 26.62 | 32.76 | 30.04 | 30.04 | 44.62  | 7.14  | 7.38  | 4.88  | 3.64 |
| SAM24242                             | 21.79 | 31.2  | 29.93 | 35.95 | 33.27 | 33.27 | 47.06  | 7.38  | 6.84  | 5.55  | 3.66 |
| SAM24248                             | 23.61 | 35.96 | 37.3  | 42.95 | 40.2  | 40.2  | 59.85  | 9.54  | 7.25  | 5.57  | 3.98 |
| SAM24252                             | 24.68 | 38.21 | 43.02 | 48.76 | 45.15 | 45.15 | 67.64  | 9.42  | 7.77  | 5.39  | 4.39 |
| SAM24247                             | 24.94 | 39.11 | 44.13 | 51.31 | 48.64 | 48.64 | 66.93  | 9.17  | 7.24  | 5.5   | 4.23 |
| <b><i>Phascolarctos cinereus</i></b> |       |       |       |       |       |       |        |       |       |       |      |
| Pcin3_14                             |       |       | -     | -     | 3.78  | 3.78  | -      | -     | -     |       |      |
| Pcin3_9                              | 4.78  | 5.08  | 5.33  | 6.06  | 5.3   | 5.3   | 8.09   | 0.87  | 0.5   | 0.41  | -    |

|           |       |       |       |        |       |       |        |       |       |       |      |
|-----------|-------|-------|-------|--------|-------|-------|--------|-------|-------|-------|------|
| Pcin3_7   | 5.95  | 6.27  | 6.47  | 7.45   | 6.44  | 6.44  | 9.82   | 1.36  | 0.78  | 0.63  | -    |
| Pcin3_6   | 6.86  | 6.8   | 7.08  | 8.27   | 7.08  | 7.08  | 10.59  | 1.26  | 0.93  | 0.79  | -    |
| Pcin3_10  | 7.85  | 7.88  | 7.82  | 9.41   | 8.12  | 8.12  | 12.57  | 2.06  | 1.15  | 0.99  | 0.81 |
| Pcin3_8   | 9.07  | 9.48  | 8.63  | 10.54  | 9.37  | 9.37  | 13.77  | 2.84  | 1.54  | 1.23  | 1.13 |
| Pcin3_5   | 10.98 | 11.93 | 10.34 | 12.68  | 10.98 | 10.98 | 16.16  | 3.38  | 2.19  | 1.66  | 1.42 |
| Pcin3_13  | 10.53 | 11.48 | 10.78 | 13.38  | 11.66 | 11.66 | 16.65  | 3.45  | 2.11  | 1.6   | 1.38 |
| Pcin3_11  | 11.71 | 13.18 | 11.48 | 14.07  | 12.53 | 12.53 | 17.88  | 3.94  | 2.42  | 2.42  | 1.65 |
| Pcin3_1   | 13.45 | 15.99 | 13.49 | 16.6   | 14.74 | 14.74 | 20.47  | 4.32  | 2.93  | 2.37  | 1.82 |
| PcinT     |       |       | 59.94 | 79.81  | 71.46 | 71.46 | 96.74  | 25.3  | 14.38 | 12.44 | 7.92 |
| PcinLge01 |       |       | -     | -      | 79.21 | 79.21 | 106.44 | 12.66 | 12.99 | 10.25 | 6.03 |
| PcinLge03 | 47.21 | 65.64 | 81.52 | 95.31  | 88.81 | 88.81 | 114.01 | 16.6  | 17.23 | 12.81 | 7.12 |
| PcinLge02 | 47.18 | 70.7  | 86.66 | 101.83 | 92.1  | 92.1  | 117    | 15.35 | 16.86 | 12.81 | 8.82 |

***Macropus eugenii***

|           |       |       |       |       |       |       |       |      |      |      |      |
|-----------|-------|-------|-------|-------|-------|-------|-------|------|------|------|------|
| Meug1621  | 4.8   | 5.02  | 5.41  | 6.06  | 5.35  | 5.34  | 8.02  | 0.4  | 0.81 | 0.62 | -    |
| Meug8647  | 6.03  | 6.36  | 6.72  | 7.66  | 6.91  | 6.79  | 10.11 | 1.14 | 1.33 | 1.09 | -    |
| Meug1694  | 6.82  | 7.28  | 7.29  | 8.43  | 7.56  | 7.53  | 11.05 | 1.6  | 1.4  | 1.23 | -    |
| Meug8931  | 6.89  | 8.74  | 8.34  | 9.68  | 8.79  | 8.67  | 12.68 | 1.77 | 1.64 | 1.47 | -    |
| Meug1658  | 7.61  | 8.29  | 8.29  | 9.62  | 8.69  | 8.7   | 12.17 | 1.54 | 1.75 | 1.56 | -    |
| Meug8770  | 8.33  | 9.2   | 9.07  | 10.47 | 9.46  | 9.49  | 13.45 | 1.87 | 1.81 | 1.57 | -    |
| Meug2957  | 8.87  | 10.16 | 10.04 | 11.67 | 10.65 | 10.64 | 14.58 | 2.35 | 2.03 | 1.83 | -    |
| Meug2965  | 9.5   | 10.86 | 10.21 | 12.03 | 10.83 | 10.89 | 14.92 | 2.57 | 2.11 | 1.99 | -    |
| Meug1682  | 10.04 | 11.38 | 10.47 | 12.37 | 11.29 | 11.21 | 15.2  | 2.81 | 2.21 | 2.02 | -    |
| Meug8858  | 11.03 | 12.57 | 12.64 | 15.03 | 13.63 | 13.64 | 18.21 | 3.12 | 2.72 | 2.43 | -    |
| Meug2912  | 12.11 | 14.3  | 13.03 | 16.35 | 14.82 | 14.85 | 19.09 | 3.93 | 3.17 | 2.74 | -    |
| Meug17162 | 12.86 | 14.51 | 14.24 | 17.38 | 15.57 | 15.58 | 19.68 | 4.21 | 3.29 | 2.89 | -    |
| Meug1723  | 13.8  | 16.01 | 15.28 | 18.87 | 17.15 | 16.89 | 21.5  | 4.31 | 3.53 | 3.27 | -    |
| Meug1720  | 14.52 | 17.77 | 17.43 | 21.76 | 19.51 | 19.48 | 25.66 | 5.24 | 4.42 | 3.87 | -    |
| Meug8737  | 17.56 | 20.5  | 19.32 | 25.03 | 22    | 21.88 | 30.21 | 6.57 | 5.45 | 5    | 4.24 |

***Monodelphis domestica***

|               |      |      |      |      |      |      |      |      |      |      |   |
|---------------|------|------|------|------|------|------|------|------|------|------|---|
| UMUT-DK150001 | 3.39 | 3.1  | 3.98 | 4.88 | 4.27 | 4.27 | 6.44 | 0.98 | 0.77 | 0.66 | - |
| UMUT-DK150002 | 5.2  | 5.28 | 4.41 | 5.71 | 5.08 | 5.08 | 7.85 | 1.89 | 1.03 | 0.93 | - |
| UMUT-DK150003 | 4.54 | 4.63 | 5.52 | 6.59 | 5.97 | 5.97 | 8.24 | 1.9  | 1.05 | 0.96 | - |
| UMUT-DK150004 | 4.36 | 4.49 | 4.83 | 5.64 | 4.95 | 4.95 | 7.21 | 1.66 | 0.91 | 0.83 | - |
| UMUT-DK150005 | 4.93 | 4.87 | 5.13 | 6.6  | 5.79 | 5.79 | 8.28 | 1.89 | 0.94 | 0.97 | - |
| UMUT-DK150006 | 4.75 | 4.68 | 4.7  | 5.93 | 5.2  | 5.2  | 7.88 | 1.8  | 0.99 | 1    | - |
| UMUT-DK150007 | 5.89 | 5.93 | 5.9  | 7.84 | 6.66 | 6.66 | 9.15 | 2.07 | 1.23 | 1.15 | - |
| UMUT-DK150008 | 6.4  | 6.27 | 5.85 | 7.61 | 6.6  | 6.6  | 9.83 | 2.23 | 1.35 | 1.28 | - |

|                      |       |           |           |       |       |       |       |      |      |      |   |
|----------------------|-------|-----------|-----------|-------|-------|-------|-------|------|------|------|---|
| UMUT-<br>DK150009    | 6.77  | 6.84      | 6.6       | 8.37  | 7.44  | 7.44  | 10.41 | 2.46 | 1.49 | 1.34 | - |
| Day 27 TMM M<br>7595 | 7.2   | 8.83      | 11.2<br>3 | 14.38 | 12.68 | 12.68 | 17.05 | 3.45 | 1.99 | 2.37 | - |
| Day 27 TMM M<br>8261 | 8.07  | 8.53      | 8.18      | 10.83 | 9.43  | 9.43  | 13.61 | 3.17 | 2.24 | 2.09 | - |
| Day 27 TMM M<br>8265 | 7.95  | 8.71      | 8.88      | 11.5  | 9.7   | 9.7   | 13.46 | 2.97 | 2.46 | 1.91 | - |
| Day 48 TMM M<br>7536 | 8.49  | 11.0<br>2 | 14.7<br>9 | 17.87 | 15.92 | 15.92 | 21.94 | 3.41 | 2.68 | 2.49 | - |
| Day 48 TMM M<br>8269 | 8.39  | 11.6<br>2 | 15.6<br>9 | 19.11 | 16.96 | 16.96 | 23.78 | 3.83 | 2.84 | 2.56 | - |
| Day 56 TMM M<br>8266 | 8.98  | 12.5<br>2 | 17.6<br>6 | 21    | 18.44 | 18.44 | 25.7  | 3.62 | 2.73 | 2.54 | - |
| Day 57 TMM M<br>7539 | 8.39  | 12.7<br>4 | 17.2<br>7 | 20.51 | 18.61 | 18.61 | 25.11 | 3.48 | 2.57 | 2.6  | - |
| Day 75 TMM M<br>7542 | 9.59  | 15.1<br>4 | 19.8      | 23.29 | 21.08 | 21.08 | 28.28 | 3.33 | 2.55 | 2.26 | - |
| Day 76 TMM M<br>8267 | 10.2  | 16.2      | 22.2<br>8 | 25.61 | 23.01 | 23.01 | 31.54 | 3.71 | 2.83 | 2.6  | - |
| Day 90 TMM M<br>7545 | 7.9   | 12.5<br>4 | 21.2<br>9 | 24.46 | 21.92 | 21.92 | 30.49 | 3.34 | 2.27 | 2.11 | - |
| Day 90 TMM M<br>8268 | 10.39 | 17.1<br>2 | 24.1<br>5 | 27.52 | 24.09 | 24.09 | 33.14 | 3.7  | 3.27 | 2.54 | - |
